# Supplementary material for: MxB sensitivity of HIV-1 is determined by a highly variable and dynamic capsid surface
Source: eLife. 2020 Jun 17;9:e56910. doi: 10.7554/eLife.56910 (PMC7299335; doi:10.7554/eLife.56910)
Supplement: Figure 4—source data 1. [file elife-56910-fig4-data1.xlsx]

## Sheet: Sheet1
					CypA loop															Helix 5
		Restriction	CsA rescue	Viral CA	CA86	CA87	CA88	CA89	CA90	CA91	CA92	CA93	CA94	CA95	CA96	CA97	CA98	CA99	CA100	CA101	CA102	CA103	CA104
		+++++	YES	R9	V	H	A	G	P	I	A	P	G	Q	M	R	E	P	R	G	S	D	I
		-	N/A	90CF056	V	H	A	G	P	I	P	P	G	Q	M	R	E	P	R	G	S	D	I
		-	N/A	92BR025	V	H	A	G	P	V	A	P	G	Q	M	R	E	P	R	G	S	D	I
		+++	NO	93BR020	T	Q	A	G	P	I	P	P	G	Q	I	R	E	P	R	G	S	D	I
		+	YES	94UG114	V	H	A	G	P	V	A	P	G	Q	L	R	E	P	R	G	S	D	I
					.	:	*	*	*	:		*	*	*	:	*	*	*	*	*	*	*	*
											Helix 6
				Viral CA	CA105	CA106	CA107	CA108	CA109	CA110	CA111	CA112	CA113	CA114	CA115	CA116	CA117	CA118	CA119	CA120	CA121	CA122	CA123
				R9	A	G	T	T	S	T	L	Q	E	Q	I	G	W	M	T	H	N	P	P
				90CF056	A	G	T	T	S	T	L	Q	E	Q	I	A	W	M	T	G	N	P	A
				92BR025	A	G	T	T	S	T	L	Q	E	Q	I	T	W	M	T	N	N	P	P
				93BR020	A	G	T	T	S	T	L	Q	E	Q	I	Q	W	M	T	G	N	P	P
				94UG114	A	G	T	T	S	N	L	Q	E	Q	I	G	W	M	T	S	N	P	P
					*	*	*	*	*	.	*	*	*	*	*		*	*	*		*	*
